# Supplementary material for: N-Ethyl-n-Nitrosourea Induced Leukaemia in a Mouse Model through Upregulation of Vascular Endothelial Growth Factor and Evading Apoptosis
Source: MDPI journal article supplement (doi:10.3390/cancers12030678), 2020-03-13
Supplement: s1 [file s1]

## Supplementary materials

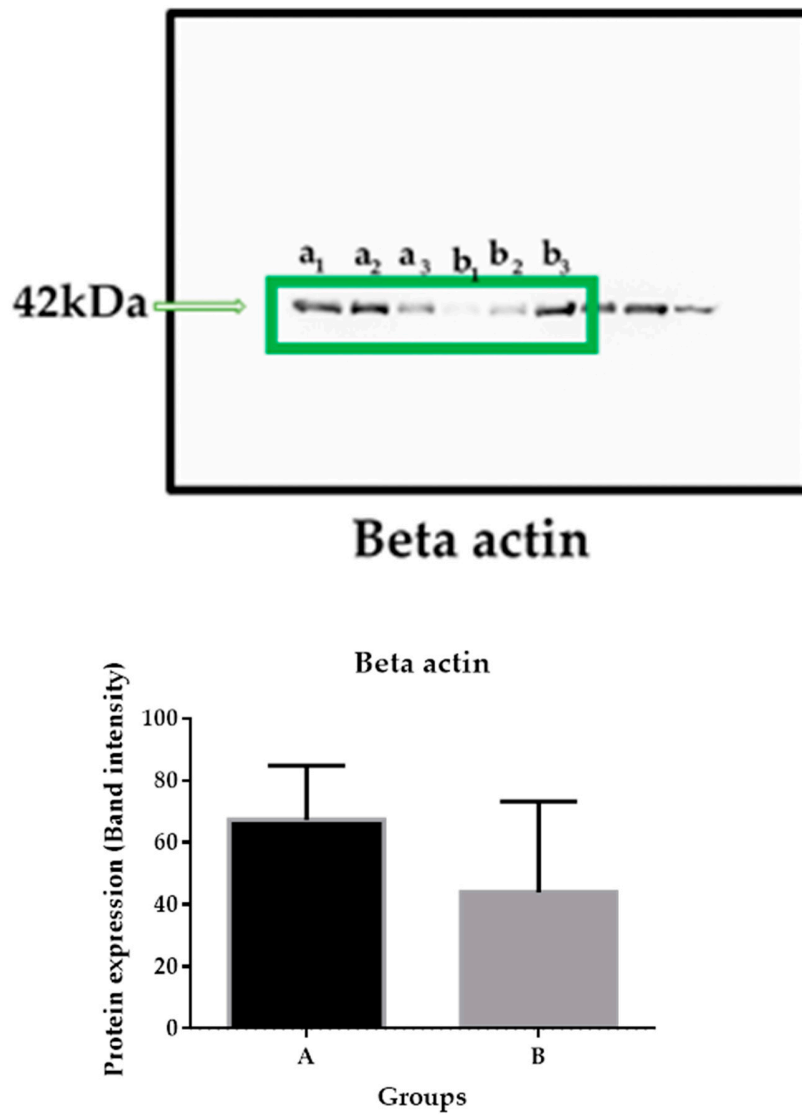

**Figure S1.** Western blot for the analyses of the expression level of beta actin protein in the spleen of male ICR-mice injected with 80 mg/kg ENU (*n*-ethyl-*n*-nitrosourea). Key:  $a_1$ - $a_3$  = samples from control group treated with normal saline,  $b_1$ - $b_3$  = samples from group B treated with 80 mg/kg ENU.

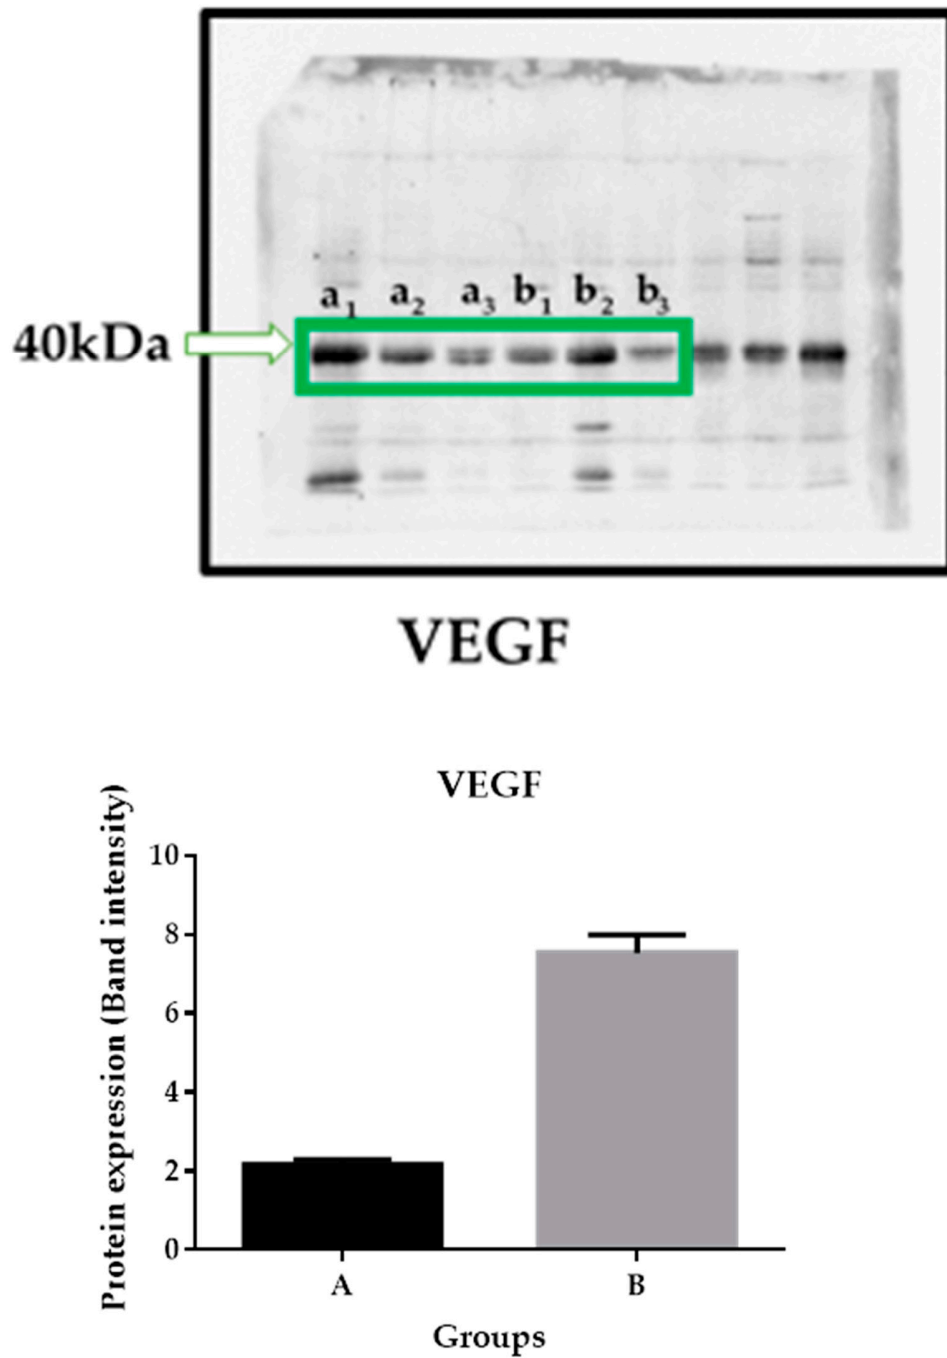

**Figure S2.** Western blot for the analyses of the expression level of VEGF protein in the spleen of male ICR-mice injected with 80 mg/kg ENU (*n*-ethyl-*n*-nitrosourea). Key: a<sub>1</sub>-a<sub>3</sub> = samples from control group treated with normal saline, b<sub>1</sub>-b<sub>3</sub> = samples from group B treated with 80 mg/kg ENU.

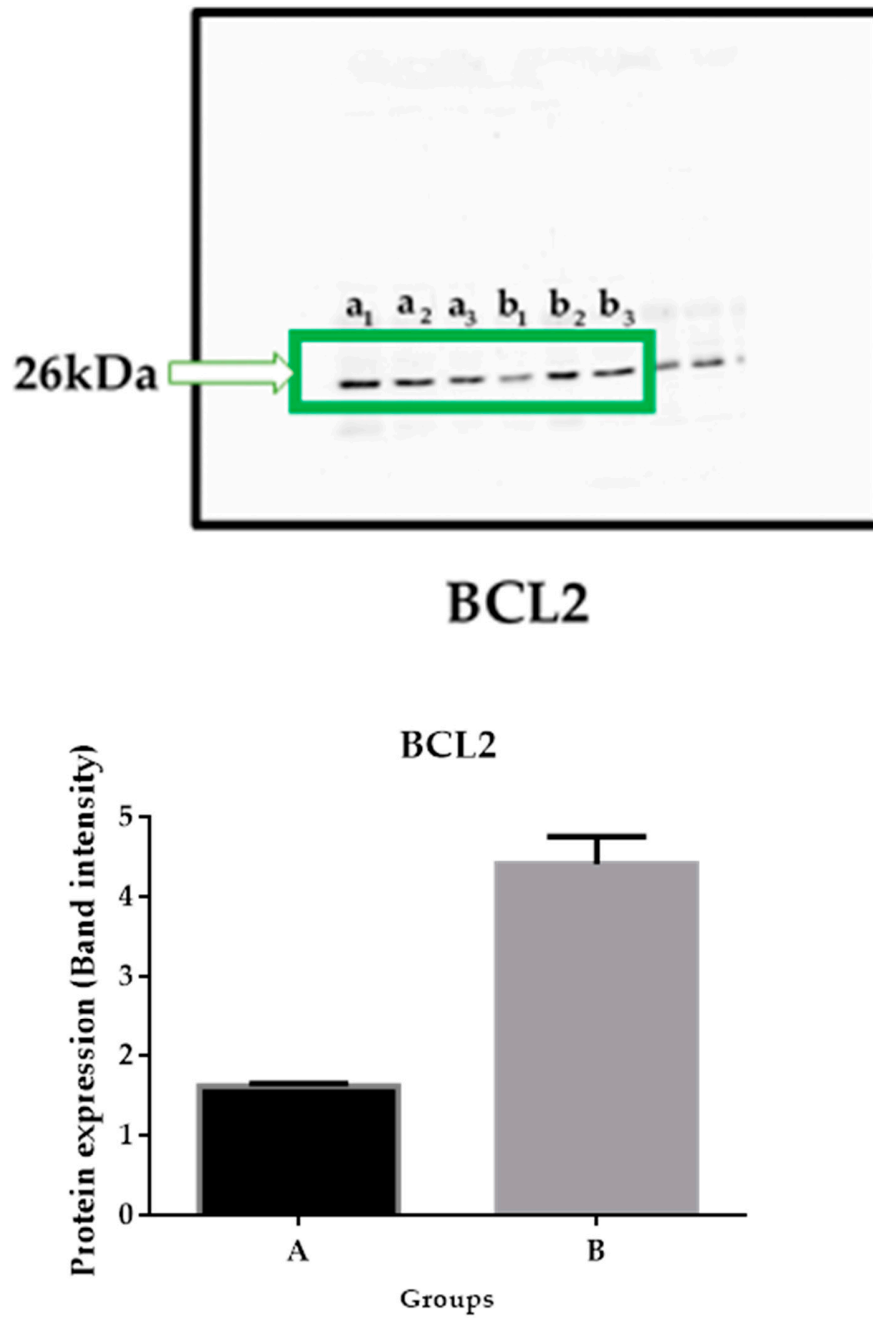

**Figure S3:** Western blot for the analyses of the expression level of BCL2 protein in the spleen of male ICR-mice injected with 80 mg/kg ENU(*n*-ethyl-*n*-nitrosourea). Key:  $a_1$ - $a_3$  = samples from control group treated with normal saline,  $b_1$ - $b_3$  = samples from group B treated with 80 mg/kg ENU.

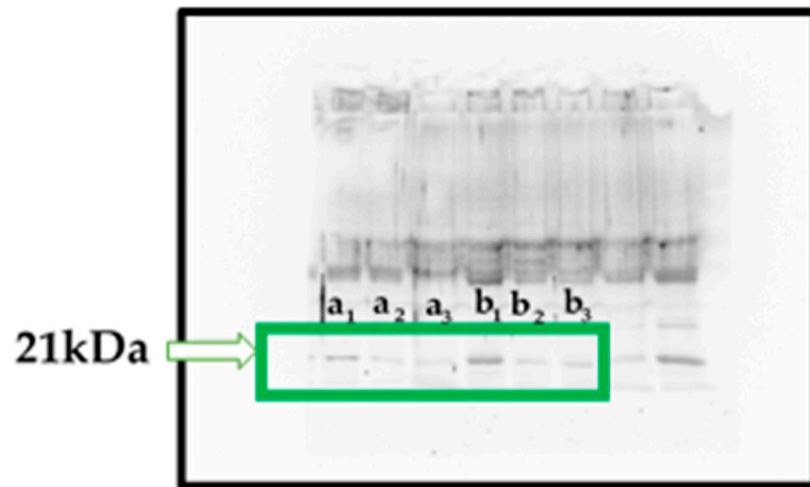

BAX

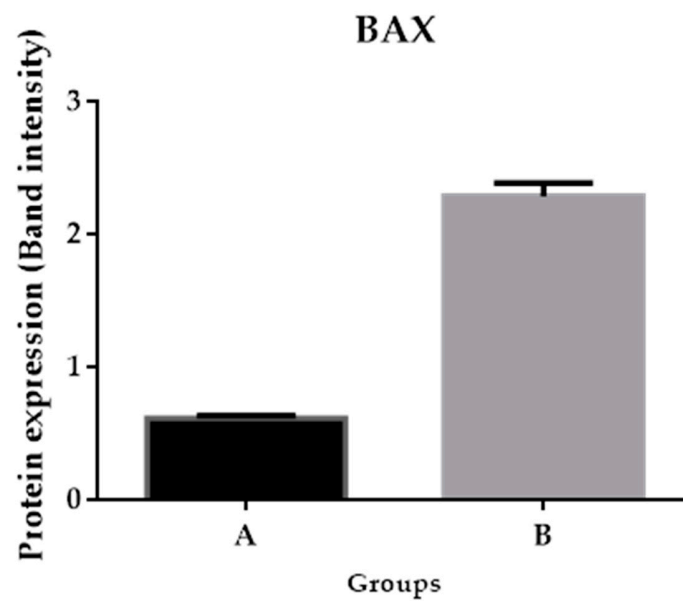

**Figure S4:** Western blot for the analyses of the expression level of BAX protein in the spleen of male ICR-mice injected with 80 mg/kg ENU (*n*-ethyl-*n*-nitrosourea). Key:  $a_1$ - $a_3$  = samples from control group treated with normal saline,  $b_1$ - $b_3$  = samples from group B treated with 80 mg/kg ENU.
